# Supplementary material for: Compound C Prevents the Unfolded Protein Response during Glucose Deprivation through a Mechanism Independent of AMPK and BMP Signaling
Source: PubMed Central journal article supplement (PMC3454318; doi:10.1371/journal.pone.0045845), 2012-09-24
Supplement: pone.0045845.s005.pdf [file pone.0045845.s005.pdf]

**Table S1.** Summary of 8 samples using microarray analysis

| Sample Name | Cell   | Compound         | Concentration       | Time |
|-------------|--------|------------------|---------------------|------|
| Cont        | HT1080 | —                | —                   | 18h  |
| CC          | HT1080 | Compound C       | 10 $\mu$ M          | 18h  |
| VST         | HT1080 | VST              | 10 $\mu$ M          | 18h  |
| Phen        | HT1080 | Phenformin       | 100 $\mu$ M         | 18h  |
| 2DG         | HT1080 | 2DG              | 10 mM               | 18h  |
| 2DG+CC      | HT1080 | 2DG / Compound C | 10 mM / 10 $\mu$ M  | 18h  |
| 2DG+VST     | HT1080 | 2DG / VST        | 10 mM / 10 $\mu$ M  | 18h  |
| 2DG+Phen    | HT1080 | 2DG / Phenformin | 10 mM / 100 $\mu$ M | 18h  |
