# Supplementary material for: Compound C Prevents the Unfolded Protein Response during Glucose Deprivation through a Mechanism Independent of AMPK and BMP Signaling
Source: PubMed Central journal article supplement (PMC3454318; doi:10.1371/journal.pone.0045845), 2012-09-24
Supplement: pone.0045845.s006.pdf [file pone.0045845.s006.pdf]

Table S2. (continued)

| Probesets   | Signal Intensity (Log <sub>2</sub> ) |        |        |        |        |        |         |          | Signal Log Ratio |       |       |       |      |        |         |          | Gene Symbol | Gene Title                                              |
|-------------|--------------------------------------|--------|--------|--------|--------|--------|---------|----------|------------------|-------|-------|-------|------|--------|---------|----------|-------------|---------------------------------------------------------|
|             | Cont                                 | CC     | VST    | Phen   | 2DG    | 2DG+CC | 2DG+VST | 2DG+Phen | Cont             | CC    | VST   | Phen  | 2DG  | 2DG+CC | 2DG+VST | 2DG+Phen |             |                                                         |
| 224741_x_at | 11.433                               | 12.748 | 12.744 | 12.187 | 12.644 | 12.284 | 12.051  | 12.613   | 0                | 1.31  | 1.31  | 0.75  | 1.21 | 0.85   | 0.62    | 1.18     | GAS5        | growth arrest-specific 5 (non-protein coding)           |
| 224841_x_at | 11.256                               | 12.588 | 12.582 | 12.112 | 12.494 | 12.115 | 11.922  | 12.442   | 0                | 1.33  | 1.33  | 0.86  | 1.24 | 0.86   | 0.67    | 1.19     | GAS5        | growth arrest-specific 5 (non-protein coding)           |
| 224915_x_at | 11.704                               | 13.099 | 12.748 | 12.429 | 12.979 | 12.996 | 12.466  | 12.984   | 0                | 1.40  | 1.04  | 0.73  | 1.27 | 1.29   | 0.76    | 1.28     | C20orf199   | chromosome 20 open reading frame 199                    |
| 224999_at   | 7.551                                | 7.501  | 7.302  | 7.418  | 8.128  | 5.689  | 7.664   | 7.468    | 0                | -0.05 | -0.25 | -0.13 | 0.58 | -1.86  | 0.11    | -0.08    | ---         | ---                                                     |
| 225090_at   | 5.626                                | 5.968  | 5.849  | 5.529  | 6.778  | 5.487  | 5.260   | 5.335    | 0                | 0.34  | 0.22  | -0.10 | 1.15 | -0.14  | -0.37   | -0.29    | SYVN1       | synovial apoptosis inhibitor 1, synoviolin              |
| 225284_at   | 8.499                                | 8.867  | 8.513  | 8.239  | 9.859  | 9.981  | 8.514   | 9.610    | 0                | 0.37  | 0.01  | -0.26 | 1.36 | 1.48   | 0.01    | 1.11     | DNAJC3      | DnaJ (Hsp40) homolog, subfamily C, member 3             |
| 225956_at   | 3.854                                | 5.260  | 6.026  | 6.364  | 6.449  | 5.741  | 4.722   | 6.662    | 0                | 1.41  | 2.17  | 2.51  | 2.60 | 1.89   | 0.87    | 2.81     | C5orf41     | chromosome 5 open reading frame 41                      |
| 225957_at   | 4.572                                | 5.679  | 6.810  | 6.766  | 7.095  | 6.413  | 5.108   | 6.718    | 0                | 1.11  | 2.24  | 2.19  | 2.52 | 1.84   | 0.54    | 2.15     | C5orf41     | chromosome 5 open reading frame 41                      |
| 226150_at   | 7.639                                | 7.014  | 7.851  | 7.573  | 8.892  | 7.388  | 8.249   | 8.033    | 0                | -0.62 | 0.21  | -0.07 | 1.25 | -0.25  | 0.61    | 0.39     | PPAPDC1B    | phosphatidic acid phosphatase type 2 domain containing  |
| 226321_at   | 7.429                                | 7.313  | 7.105  | 7.502  | 7.882  | 3.475  | 4.639   | 4.995    | 0                | -0.12 | -0.32 | 0.07  | 0.45 | -3.95  | -2.79   | -2.43    | LYSMD3      | LysM, putative peptidoglycan-binding, domain containing |
| 226384_at   | 5.743                                | 6.423  | 6.671  | 6.307  | 7.141  | 6.256  | 5.605   | 5.202    | 0                | 0.68  | 0.93  | 0.56  | 1.40 | 0.51   | -0.14   | -0.54    | PPAPDC1B    | phosphatidic acid phosphatase type 2 domain containing  |
| 226835_s_at | 11.459                               | 12.872 | 12.538 | 12.135 | 12.751 | 12.848 | 12.287  | 12.833   | 0                | 1.41  | 1.08  | 0.68  | 1.29 | 1.39   | 0.83    | 1.37     | C20orf199   | chromosome 20 open reading frame 199                    |
| 226886_at   | 5.852                                | 6.227  | 6.854  | 5.690  | 5.975  | 5.653  | 5.166   | 3.974    | 0                | 0.38  | 1.00  | -0.16 | 0.12 | -0.20  | -0.69   | -1.88    | GFPT1       | glutamine--fructose-6-phosphate transaminase 1          |
| 227027_at   | 5.952                                | 6.400  | 7.059  | 5.711  | 6.433  | 6.018  | 4.384   | 3.782    | 0                | 0.45  | 1.11  | -0.24 | 0.48 | 0.07   | -1.57   | -2.17    | GFPT1       | glutamine--fructose-6-phosphate transaminase 1          |
| 227033_at   | 6.247                                | 5.468  | 5.944  | 6.078  | 7.950  | 7.043  | 6.884   | 6.748    | 0                | -0.78 | -0.30 | -0.17 | 1.70 | 0.80   | 0.64    | 0.50     | PDIA3       | protein disulfide isomerase family A, member 3          |
| 227443_at   | 5.830                                | 6.498  | 7.980  | 7.138  | 7.357  | 3.950  | 4.293   | 3.871    | 0                | 0.67  | 2.15  | 1.31  | 1.53 | -1.88  | -1.54   | -1.96    | C9orf150    | chromosome 9 open reading frame 150                     |
| 227755_at   | 4.723                                | 6.737  | 6.240  | 5.142  | 6.294  | 6.595  | 4.585   | 5.073    | 0                | 2.01  | 1.52  | 0.42  | 1.57 | 1.87   | -0.14   | 0.35     | ---         | ---                                                     |
| 227900_at   | 2.618                                | 3.528  | 2.853  | 3.341  | 3.079  | 3.836  | 1.578   | 2.405    | 0                | 0.91  | 0.24  | 0.72  | 0.46 | 1.22   | -1.04   | -0.21    | CBLB        | Cas-Br-M (murine) ecotropic retroviral transforming     |
| 228250_at   | 4.303                                | 4.861  | 5.053  | 4.787  | 5.492  | 5.338  | 4.435   | 5.922    | 0                | 0.56  | 0.75  | 0.48  | 1.19 | 1.04   | 0.13    | 1.62     | FNIP1       | folliculin interacting protein 1                        |
| 228482_at   | 5.656                                | 5.879  | 6.124  | 6.216  | 6.977  | 5.423  | 5.229   | 4.883    | 0                | 0.22  | 0.47  | 0.56  | 1.32 | -0.23  | -0.43   | -0.77    | CDRT4       | CMT1A duplicated region transcript 4                    |
| 228846_at   | 4.463                                | 5.354  | 7.073  | 5.709  | 5.930  | 7.785  | 6.955   | 8.042    | 0                | 0.89  | 2.61  | 1.25  | 1.47 | 3.32   | 2.49    | 3.58     | MXD1        | MAX dimerization protein 1                              |
| 229453_at   | 5.815                                | 4.886  | 5.145  | 5.025  | 7.305  | 6.896  | 6.526   | 6.330    | 0                | -0.93 | -0.67 | -0.79 | 1.49 | 1.08   | 0.71    | 0.51     | PDIA3       | protein disulfide isomerase family A, member 3          |
| 229618_at   | 5.599                                | 5.657  | 6.141  | 6.214  | 5.695  | 5.856  | 3.828   | 3.858    | 0                | 0.06  | 0.54  | 0.62  | 0.10 | 0.26   | -1.77   | -1.74    | SNX16       | sorting nexin 16                                        |
| 229838_at   | 3.619                                | 3.655  | 3.493  | 3.809  | 4.995  | 3.651  | 4.166   | 4.045    | 0                | 0.04  | -0.13 | 0.19  | 1.38 | 0.03   | 0.55    | 0.43     | NUCB2       | nucleobindin 2                                          |
| 230031_at   | 7.212                                | 7.525  | 7.019  | 7.272  | 9.041  | 8.955  | 7.668   | 8.352    | 0                | 0.31  | -0.19 | 0.06  | 1.83 | 1.74   | 0.46    | 1.14     | HSPA5       | heat shock 70kDa protein 5 (glucose-regulated protein,  |
| 230265_at   | 6.695                                | 7.160  | 7.488  | 6.813  | 8.292  | 7.203  | 5.143   | 6.345    | 0                | 0.47  | 0.79  | 0.12  | 1.60 | 0.51   | -1.55   | -0.35    | ---         | ---                                                     |
| 230659_at   | 5.837                                | 5.987  | 5.829  | 5.721  | 6.563  | 5.813  | 4.088   | 3.791    | 0                | 0.15  | -0.01 | -0.12 | 0.73 | -0.02  | -1.75   | -2.05    | EDEM1       | ER degradation enhancer, mannosidase alpha-like 1       |
| 231944_at   | 3.892                                | 4.118  | 4.343  | 4.229  | 5.679  | 3.836  | 3.495   | 3.485    | 0                | 0.23  | 0.45  | 0.34  | 1.79 | -0.06  | -0.40   | -0.41    | ERO1LB      | ERO1-like beta (S. cerevisiae)                          |
| 235341_at   | 4.322                                | 4.353  | 3.990  | 4.002  | 5.659  | 6.585  | 4.830   | 6.048    | 0                | 0.03  | -0.33 | -0.32 | 1.34 | 2.26   | 0.51    | 1.73     | DNAJC3      | DnaJ (Hsp40) homolog, subfamily C, member 3             |
| 236285_at   | 2.729                                | 3.049  | 3.615  | 3.308  | 5.683  | 2.567  | 3.074   | 3.636    | 0                | 0.32  | 0.89  | 0.58  | 2.95 | -0.16  | 0.34    | 0.91     | KLHDC7B     | kelch domain containing 7B                              |
| 239077_at   | 2.860                                | 2.751  | 2.838  | 2.539  | 3.366  | 3.415  | 3.740   | 3.959    | 0                | -0.11 | -0.02 | -0.32 | 0.51 | 0.56   | 0.88    | 1.10     | CSGALNACT2  | chondroitin sulfate N-acetylgalactosaminyltransferase 2 |
| 240277_at   | 5.061                                | 5.471  | 5.485  | 4.630  | 5.845  | 4.728  | 4.647   | 5.012    | 0                | 0.41  | 0.42  | -0.43 | 0.78 | -0.33  | -0.41   | -0.05    | ---         | ---                                                     |
| 244841_at   | 6.046                                | 6.722  | 6.528  | 5.991  | 6.739  | 8.337  | 6.368   | 7.276    | 0                | 0.68  | 0.48  | -0.06 | 0.69 | 2.29   | 0.32    | 1.23     | SEC24A      | SEC24 family, member A (S. cerevisiae)                  |
