# Supplementary material for: Compound C Prevents the Unfolded Protein Response during Glucose Deprivation through a Mechanism Independent of AMPK and BMP Signaling
Source: PubMed Central journal article supplement (PMC3454318; doi:10.1371/journal.pone.0045845), 2012-09-24
Supplement: pone.0045845.s007.pdf [file pone.0045845.s007.pdf]

Table S3. (continued)

| Probesets   | Signal Intensity (Log <sub>2</sub> ) |       |       |       |       |        |         |          | Signal Log Ratio |       |       |       |       |        |         |          | Gene Symbol  | Gene Title                                                                                 |
|-------------|--------------------------------------|-------|-------|-------|-------|--------|---------|----------|------------------|-------|-------|-------|-------|--------|---------|----------|--------------|--------------------------------------------------------------------------------------------|
|             | Cont                                 | CC    | VST   | Phen  | 2DG   | 2DG+CC | 2DG+VST | 2DG+Phen | Cont             | CC    | VST   | Phen  | 2DG   | 2DG+CC | 2DG+VST | 2DG+Phen |              |                                                                                            |
| 218755_at   | 9.004                                | 8.103 | 8.529 | 8.139 | 7.105 | 6.360  | 8.422   | 7.987    | 0                | -0.90 | -0.48 | -0.87 | -1.90 | -2.64  | -0.58   | -1.02    | KIF20A       | kinesin family member 20A                                                                  |
| 218866_s_at | 9.151                                | 9.009 | 8.314 | 7.957 | 8.163 | 8.851  | 9.299   | 8.937    | 0                | -0.14 | -0.84 | -1.19 | -0.99 | -0.30  | 0.15    | -0.21    | POLR3K       | polymerase (RNA) III (DNA directed) polypeptide K, 12.3                                    |
| 219650_at   | 7.665                                | 6.523 | 6.164 | 6.848 | 6.522 | 5.833  | 5.764   | 5.768    | 0                | -1.14 | -1.50 | -0.82 | -1.14 | -1.83  | -1.90   | -1.90    | ERCC6L       | excision repair cross-complementing rodent repair deficiency, complementation group 6-like |
| 219918_s_at | 9.675                                | 9.073 | 9.340 | 9.289 | 8.854 | 6.327  | 7.576   | 7.228    | 0                | -0.60 | -0.33 | -0.39 | -0.82 | -3.35  | -2.10   | -2.45    | ASPM         | asp (abnormal spindle) homolog, microcephaly associated (Drosophila)                       |
| 219990_at   | 6.706                                | 5.822 | 4.752 | 6.051 | 5.183 | 2.360  | 3.957   | 3.191    | 0                | -0.88 | -1.95 | -0.66 | -1.52 | -4.35  | -2.75   | -3.52    | E2F8         | E2F transcription factor 8                                                                 |
| 220085_at   | 7.187                                | 6.640 | 5.943 | 5.790 | 5.761 | 6.851  | 6.704   | 6.434    | 0                | -0.55 | -1.24 | -1.40 | -1.43 | -0.34  | -0.48   | -0.75    | HELLS        | helicase, lymphoid-specific                                                                |
| 220651_s_at | 9.312                                | 8.165 | 7.511 | 7.847 | 8.084 | 7.186  | 9.159   | 8.891    | 0                | -1.15 | -1.80 | -1.46 | -1.23 | -2.13  | -0.15   | -0.42    | MCM10        | minichromosome maintenance complex component 10                                            |
| 221436_s_at | 8.133                                | 6.538 | 7.363 | 7.056 | 6.473 | 5.831  | 8.051   | 7.360    | 0                | -1.60 | -0.77 | -1.08 | -1.66 | -2.30  | -0.08   | -0.77    | CDCA3        | cell division cycle associated 3                                                           |
| 221520_s_at | 8.244                                | 7.458 | 7.715 | 7.211 | 7.009 | 6.188  | 7.535   | 7.562    | 0                | -0.79 | -0.53 | -1.03 | -1.24 | -2.06  | -0.71   | -0.68    | CDCA8        | cell division cycle associated 8                                                           |
| 221521_s_at | 8.813                                | 8.111 | 7.219 | 7.902 | 7.804 | 7.820  | 8.802   | 8.152    | 0                | -0.70 | -1.59 | -0.91 | -1.01 | -0.99  | -0.01   | -0.66    | GIN52        | GIN5 complex subunit 2 (Psf2 homolog)                                                      |
| 221591_s_at | 6.960                                | 6.563 | 6.621 | 6.308 | 5.569 | 5.184  | 7.059   | 6.402    | 0                | -0.40 | -0.34 | -0.65 | -1.39 | -1.78  | 0.10    | -0.56    | FAM64A       | family with sequence similarity 64, member A                                               |
| 221727_at   | 8.174                                | 7.489 | 7.196 | 6.892 | 6.422 | 6.122  | 7.495   | 7.080    | 0                | -0.68 | -0.98 | -1.28 | -1.75 | -2.05  | -0.68   | -1.09    | SUB1         | SUB1 homolog (S. cerevisiae)                                                               |
| 221965_at   | 6.639                                | 6.588 | 5.147 | 5.638 | 5.184 | 4.571  | 5.368   | 4.906    | 0                | -0.05 | -1.49 | -1.00 | -1.45 | -2.07  | -1.27   | -1.73    | MPHOSPH9     | M-phase phosphoprotein 9                                                                   |
| 222962_s_at | 8.092                                | 7.371 | 6.098 | 6.760 | 6.826 | 5.880  | 7.510   | 7.345    | 0                | -0.72 | -1.99 | -1.33 | -1.27 | -2.21  | -0.58   | -0.75    | MCM10        | minichromosome maintenance complex component 10                                            |
| 223307_at   | 8.909                                | 7.306 | 8.049 | 8.018 | 6.987 | 6.701  | 8.773   | 8.242    | 0                | -1.50 | -0.76 | -0.79 | -1.82 | -2.11  | -0.04   | -0.57    | CDCA3        | cell division cycle associated 3                                                           |
| 223570_at   | 7.805                                | 7.210 | 5.835 | 6.478 | 6.248 | 4.916  | 6.897   | 6.729    | 0                | -0.69 | -2.07 | -1.43 | -1.66 | -2.99  | -1.01   | -1.18    | MCM10        | minichromosome maintenance complex component 10                                            |
| 224428_s_at | 8.911                                | 8.644 | 7.664 | 7.841 | 7.308 | 7.784  | 8.918   | 8.890    | 0                | -0.27 | -1.25 | -1.07 | -1.60 | -1.13  | 0.01    | -0.02    | CDCA7        | cell division cycle associated 7                                                           |
| 224509_s_at | 7.013                                | 6.703 | 6.014 | 6.083 | 5.930 | 4.618  | 4.322   | 4.207    | 0                | -0.31 | -1.00 | -0.93 | -1.08 | -2.40  | -2.69   | -2.81    | RTN4IP1      | reticulon 4 interacting protein 1                                                          |
| 224865_at   | 7.517                                | 6.475 | 6.265 | 6.203 | 5.828 | 6.282  | 6.553   | 5.888    | 0                | -1.04 | -1.25 | -1.31 | -1.69 | -1.24  | -0.96   | -1.63    | FAR1         | fatty acyl CoA reductase 1                                                                 |
| 225108_at   | 8.060                                | 6.977 | 6.751 | 6.776 | 5.982 | 6.365  | 7.443   | 6.915    | 0                | -1.08 | -1.31 | -1.28 | -2.08 | -1.70  | -0.62   | -1.15    | AGPS         | alkylglycerone phosphate synthase                                                          |
| 225687_at   | 9.480                                | 8.032 | 8.460 | 8.569 | 7.731 | 7.756  | 7.570   | 7.112    | 0                | -1.45 | -1.02 | -0.91 | -1.75 | -1.72  | -1.91   | -2.37    | FAM83D       | family with sequence similarity 83, member D                                               |
| 226775_at   | 7.745                                | 7.042 | 6.017 | 6.031 | 5.958 | 5.260  | 7.603   | 7.160    | 0                | -0.70 | -1.73 | -1.71 | -1.79 | -2.49  | -0.14   | -0.58    | ENY2         | enhancer of yellow 2 homolog (Drosophila)                                                  |
| 227164_at   | 6.554                                | 6.797 | 5.812 | 4.702 | 4.904 | 5.250  | 5.462   | 5.250    | 0                | 0.24  | -0.74 | -1.85 | -1.65 | -1.30  | -1.09   | -1.30    | SFRS1        | splicing factor, arginine/serine-rich 1                                                    |
| 227349_at   | 4.484                                | 4.468 | 3.655 | 3.735 | 3.817 | 3.983  | 4.571   | 4.335    | 0                | -0.02 | -0.83 | -0.75 | -0.67 | -0.50  | 0.09    | -0.15    | HELLS        | helicase, lymphoid-specific                                                                |
| 227350_at   | 8.317                                | 7.563 | 6.931 | 7.040 | 6.526 | 7.467  | 8.032   | 7.588    | 0                | -0.75 | -1.39 | -1.28 | -1.79 | -0.85  | -0.28   | -0.73    | HELLS        | helicase, lymphoid-specific                                                                |
| 227578_at   | 5.117                                | 2.987 | 3.224 | 4.150 | 3.131 | 2.841  | 3.459   | 3.184    | 0                | -2.13 | -1.89 | -0.97 | -1.99 | -2.28  | -1.66   | -1.93    | LOC100128191 | hypothetical protein LOC100128191                                                          |
| 227896_at   | 8.399                                | 8.037 | 6.779 | 6.420 | 7.451 | 9.557  | 7.934   | 7.082    | 0                | -0.36 | -1.62 | -1.98 | -0.95 | 1.16   | -0.46   | -1.32    | BCCIP        | BRCA2 and CDKN1A interacting protein                                                       |
| 228045_at   | 6.577                                | 6.109 | 4.633 | 4.652 | 5.034 | 2.089  | 5.655   | 4.861    | 0                | -0.47 | -1.94 | -1.93 | -1.54 | -4.49  | -0.92   | -1.72    | ---          | ---                                                                                        |
| 228773_at   | 5.809                                | 6.202 | 4.940 | 6.038 | 4.916 | 6.331  | 6.251   | 5.754    | 0                | 0.39  | -0.87 | 0.23  | -0.89 | 0.52   | 0.44    | -0.05    | ---          | ---                                                                                        |
| 228899_at   | 6.786                                | 5.876 | 5.980 | 6.412 | 5.335 | 4.561  | 6.264   | 5.486    | 0                | -0.91 | -0.81 | -0.37 | -1.45 | -2.23  | -0.52   | -1.30    | LOC100132884 | hypothetical protein LOC100132884                                                          |
| 228987_at   | 7.273                                | 7.791 | 5.020 | 5.658 | 5.622 | 6.251  | 7.484   | 6.659    | 0                | 0.52  | -2.25 | -1.62 | -1.65 | -1.02  | 0.21    | -0.61    | ---          | ---                                                                                        |
| 229126_at   | 8.323                                | 7.835 | 7.692 | 8.282 | 7.540 | 4.993  | 7.183   | 6.339    | 0                | -0.49 | -0.63 | -0.04 | -0.78 | -3.33  | -1.14   | -1.98    | TMEM19       | transmembrane protein 19                                                                   |
| 229129_at   | 7.559                                | 6.015 | 6.702 | 6.930 | 5.835 | 7.457  | 7.493   | 7.037    | 0                | -1.54 | -0.86 | -0.63 | -1.72 | -0.10  | -0.07   | -0.52    | ---          | ---                                                                                        |
| 229305_at   | 6.502                                | 7.096 | 5.057 | 5.191 | 5.241 | 6.203  | 6.928   | 6.530    | 0                | 0.59  | -1.45 | -1.31 | -1.26 | -0.30  | 0.43    | 0.03     | MLF1IP       | MLF1 interacting protein                                                                   |
| 232238_at   | 5.337                                | 5.405 | 5.226 | 5.238 | 4.682 | 3.685  | 3.872   | 3.196    | 0                | 0.07  | -0.11 | -0.10 | -0.66 | -1.65  | -1.47   | -2.14    | ASPM         | asp (abnormal spindle) homolog, microcephaly associated (Drosophila)                       |
| 235545_at   | 7.873                                | 7.044 | 7.524 | 6.884 | 6.063 | 5.710  | 7.527   | 7.308    | 0                | -0.83 | -0.35 | -0.99 | -1.81 | -2.16  | -0.35   | -0.57    | DEPDC1       | DEP domain containing 1                                                                    |
| 235572_at   | 7.880                                | 6.249 | 6.614 | 6.997 | 6.916 | 6.036  | 6.287   | 5.317    | 0                | -1.63 | -1.27 | -0.88 | -0.96 | -1.84  | -1.59   | -2.56    | SPC24        | SPC24, NDC80 kinetochore complex component, homolog (S. cerevisiae)                        |
| 238431_at   | 7.430                                | 7.173 | 6.452 | 6.410 | 5.886 | 4.789  | 6.257   | 5.710    | 0                | -0.26 | -0.98 | -1.02 | -1.54 | -2.64  | -1.17   | -1.72    | ---          | ---                                                                                        |
| 238529_at   | 4.346                                | 3.082 | 3.511 | 3.575 | 3.550 | 2.627  | 3.440   | 2.538    | 0                | -1.26 | -0.83 | -0.77 | -0.80 | -1.72  | -0.91   | -1.81    | LOC730631    | Hypothetical LOC730631                                                                     |
| 239002_at   | 6.266                                | 5.934 | 6.982 | 7.146 | 5.541 | 4.737  | 6.246   | 6.096    | 0                | -0.33 | 0.72  | 0.88  | -0.73 | -1.53  | -0.02   | -0.17    | ASPM         | asp (abnormal spindle) homolog, microcephaly associated (Drosophila)                       |
| 239252_at   | 5.632                                | 4.288 | 4.118 | 4.652 | 3.461 | 4.529  | 4.824   | 3.587    | 0                | -1.34 | -1.51 | -0.98 | -2.17 | -1.10  | -0.81   | -2.04    | COX7B        | cytochrome c oxidase subunit VIIb                                                          |
| 242300_at   | 6.230                                | 5.989 | 4.625 | 5.036 | 4.255 | 3.018  | 5.255   | 4.038    | 0                | -0.24 | -1.61 | -1.19 | -1.98 | -3.21  | -0.98   | -2.19    | ---          | ---                                                                                        |
| 242890_at   | 6.949                                | 6.202 | 5.260 | 5.440 | 4.938 | 6.355  | 6.759   | 6.290    | 0                | -0.75 | -1.69 | -1.51 | -2.01 | -0.59  | -0.19   | -0.66    | ---          | ---                                                                                        |
